# Supplementary material for: Effects of Sulfurization Pressure on the Conversion Efficiency of Cosputtered Cu2ZnSnS4Thin Film Solar Cells
Source: Hindawi journal article supplement (doi:10.1155/2015/750846), 2015-01-01

# CERTIFICATE OF EDITING

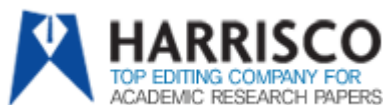

*Scientific English Research Paper Editing Service*

1108, Hwanghwa B/D, 832-7, Yeoksam-Dong Kangnam-Ku

Seoul, the Republic of Korea

Tel : 82-2-557-1810~1

<http://en.harrisco.net>

The following manuscript was proofread and edited by  
the professional English editors at HARRISCO.

## **Manuscript Title :**

Effects of sulfurization pressure on the conversion efficiency of co-sputtered Cu<sub>2</sub>ZnSnS<sub>4</sub> thin film solar cells

## **Manuscript Authors :**

YOO JI BEM

## **Date of Issue: :**

September 21, 2015

Yours truly,

HARRISCO

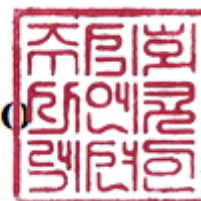

Supplement: f1 [file 750846.f1.zip]
