# Supplementary material for: Effects of Sulfurization Pressure on the Conversion Efficiency of Cosputtered Cu2ZnSnS4Thin Film Solar Cells
Source: Hindawi journal article supplement (doi:10.1155/2015/750846), 2015-01-01
Supplement: f1 [file 750846.f1.zip]

Archive with 2 entries (2 files):
- Certificate of Editing.pdf
- Supplementary Figure.pdf
